# Supplementary material for: Multilocus Genotyping of ‘Candidatus Phytoplasma Solani’ Associated with Grapevine Bois Noir in Iran
Source: MDPI journal article supplement (doi:10.3390/biology11060835), 2022-05-29
Supplement: s1 [file s1]

**Supplementary Figure S1.** Actual (right) and virtual (left) restriction fragment length polymorphism patterns of the representative *vmp1* gene sequences amplified with the primer pair TYPH10F/R from the representative ‘*Candidatus* Phytoplasma solani’ strains. M 100 bp: Ladder, 100 bp (New England Biolabs).

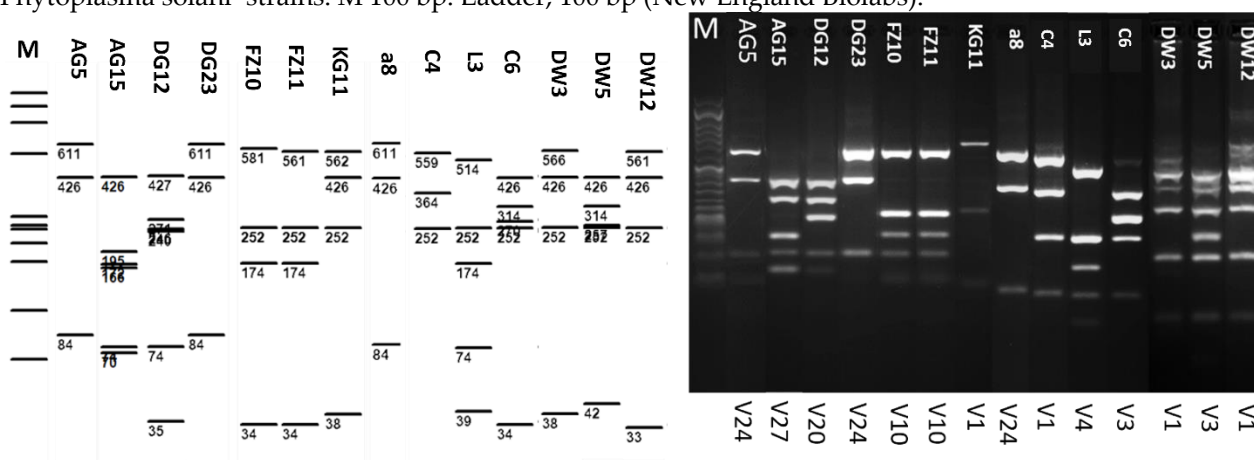

**Supplementary Table S1.** List of primers used for amplification of 16Sr DNA, *tuf*, *vmp1* and *stamp* genes

| Primer           | Sequence                  | Reference                  |
|------------------|---------------------------|----------------------------|
| P1               | AAGAGTTTGATCCTGGCTCAGGATT | Maixner et al., 1995       |
| P7               | GGATGGATCACCTCCTT         | Maixner et al., 1995       |
| <i>fstol</i>     | GCCATCATTAAGTTGGGGA       | Maixner et al., 1995       |
| <i>rstol</i>     | AGATGTGACCTATTTTGGTGG     | Maixner et al., 1995       |
| STOLTUF-F0       | GCACGTTGATCACGGCAAAC      | Balakishiyeva et al., 2018 |
| STOLTUFR0        | CTGTTTTTCCACCTTCACGG      | Balakishiyeva et al., 2018 |
| <i>fTufAY</i>    | GCTAAAAGTAGAGCTTATGA      | Schneider et al., 1997     |
| <i>rTufAY</i>    | CGTTGTCACCTGGCATTACC      | Schneider et al., 1997     |
| <i>StolH10F1</i> | AGGTTGTAAAATCTTTTATGT     | Cimerman et al., 2009      |
| <i>StolH10R1</i> | GCGGATGGCTTTTCATTATTTGAC  | Cimerman et al., 2009      |
| <i>StolH10F2</i> | GGATTGATAGATGCTGCCCC      | Cimerman et al., 2009      |
| <i>StolH10R2</i> | CCATCAAAACTTTTTGGTTTAGGC  | Cimerman et al., 2009      |
| TYPH10F          | AACGTTTCATCAACAATCAGTC    | Fialova et al., 2009       |
| TYPH10R          | CACTTCTTTCAGGCAACTTC      | Fialova et al., 2009       |
| <i>StampF0</i>   | GTAGGTTTTGGATGTTTTAAG     | Fabre et al., 2011         |
| <i>StampR0</i>   | AAATAAAAGAACAAGTATAGACGA  | Fabre et al., 2011         |
| <i>StampF1</i>   | TTCTTTAAACACACCAAGAC      | Fabre et al., 2011         |
| <i>StampR1</i>   | AAGCCAGAATTTAATCTAGC      | Fabre et al., 2011         |

**Supplementary Table S2.** Detailed information about grapevine and weeds infected by '*Candidatus* Phytoplasma solani' in Iranian vineyards.

| Isolate | Host                  | variety                       | province              | Molecular characterization |                     |             |
|---------|-----------------------|-------------------------------|-----------------------|----------------------------|---------------------|-------------|
|         |                       |                               |                       | <i>Tuf</i> type            | <i>vmp1</i> profile | stamp       |
| AG1     | <i>Vitis vinifera</i> | Qezel uzum                    | Azarbaijan<br>Gharbi  | b1                         | V24                 |             |
| AG2     | <i>Vitis vinifera</i> | Qezel uzum                    | Azarbaijan<br>Gharbi  | b1                         | V24                 |             |
| AG4     | <i>Vitis vinifera</i> | Qezel uzum                    | Azarbaijan<br>Gharbi  | b1                         | V24                 |             |
| AG5     | <i>Vitis vinifera</i> | Qezel uzum                    | Azarbaijan<br>Gharbi  | b1                         | V24                 |             |
| AG6     | <i>Vitis vinifera</i> | Qezel uzum                    | Azarbaijan<br>Gharbi  | b1                         | V24                 |             |
| AG14    | <i>Vitis vinifera</i> | Qezel uzum                    | Azarbaijan<br>Gharbi  | b1                         | V24                 |             |
| AG15    | <i>Vitis vinifera</i> | Qezel uzum                    | Azarbaijan<br>Gharbi  | b1                         | V27                 | Cluster III |
| a7      | <i>Vitis vinifera</i> | Qermez<br>Bidane<br>Keshmeshi | Azarbaijan<br>Gharbi  | b1                         | V1                  |             |
| a8      | <i>Vitis vinifera</i> | Qermez<br>Bidane<br>Keshmeshi | Azarbaijan<br>Gharbi  | b5                         | V24                 | Cluster III |
| a11     | <i>Vitis vinifera</i> | Qermez<br>Bidane<br>Keshmeshi | Azarbaijan<br>Gharbi  | b1                         | V24                 |             |
| a13     | <i>Vitis vinifera</i> | Qermez<br>Bidane<br>Keshmeshi | Azarbaijan<br>Gharbi  | b1                         | V24                 |             |
| a20     | <i>Vitis vinifera</i> | Qermez<br>Bidane<br>Keshmeshi | Azarbaijan<br>Gharbi  | b1                         | V4                  |             |
| a22     | <i>Vitis vinifera</i> | Qermez<br>Bidane<br>Keshmeshi | Azarbaijan<br>Gharbi  | b1                         | V4                  |             |
| b1      | <i>Vitis vinifera</i> | Khalili                       | Azarbaijan<br>Sharghi | b1                         | V4                  |             |

|       |                       |                               |                       |    |     |             |
|-------|-----------------------|-------------------------------|-----------------------|----|-----|-------------|
| BG2   | <i>Vitis vinifera</i> | Khalili                       | Azarbaijan<br>Sharghi | b1 | V27 |             |
| b14   | <i>Vitis vinifera</i> | Khalili                       | Azarbaijan<br>Sharghi | b1 | V4  |             |
| BG4   | <i>Vitis vinifera</i> | Fakhri                        | Azarbaijan<br>Sharghi | b1 | V4  |             |
| BG9   | <i>Vitis vinifera</i> | Fakhri                        | Azarbaijan<br>Sharghi | b1 | V1  |             |
| FG1   | <i>Vitis vinifera</i> | Rish-baba                     | Fars                  | b1 | V10 |             |
| FZ11  | <i>Vitis vinifera</i> | Askari                        | Fars                  | b1 | V10 |             |
| FZ10  | <i>Vitis vinifera</i> | Askari                        | Fars                  | b1 | V10 |             |
| KG10  | <i>Vitis vinifera</i> | Peykami                       | Khorasan<br>Razavi    | b1 | V1  |             |
| KG11  | <i>Vitis vinifera</i> | Peykami                       | Khorasan<br>Razavi    | b1 | V1  | Cluster III |
| phG1  | <i>Vitis vinifera</i> | Peykami                       | Khorasan<br>Razavi    | b1 | V24 |             |
| phG2  | <i>Vitis vinifera</i> | Peykami                       | Khorasan<br>Razavi    | b1 | V24 |             |
| phG10 | <i>Vitis vinifera</i> | Peykami                       | Khorasan<br>Razavi    | b1 | V24 |             |
| L3    | <i>Vitis vinifera</i> | Askari                        | Lorestan              | b1 | V4  | Cluster III |
| LG17  | <i>Vitis vinifera</i> | Sefide<br>Bidane<br>keshmeshi | Lorestan              | b1 | V27 |             |
| LG18  | <i>Vitis vinifera</i> | Sefide<br>Bidane<br>keshmeshi | Lorestan              | b1 | V27 |             |
| LG19  | <i>Vitis vinifera</i> | Sefide<br>Bidane<br>keshmeshi | Lorestan              | b1 | V27 |             |
| dG1   | <i>Vitis vinifera</i> | Qermez<br>Bidane<br>Keshmeshi | Zanjan                | b1 | V24 |             |

|      |                       |                               |        |    |     |             |
|------|-----------------------|-------------------------------|--------|----|-----|-------------|
|      |                       | Sefide<br>Bidane<br>keshmeshi |        |    |     |             |
| dG5  | <i>Vitis vinifera</i> | Sefide<br>Bidane<br>keshmeshi | Zanjan | b1 | V3  |             |
| dG6  | <i>Vitis vinifera</i> | Qermez<br>Bidane<br>Keshmeshi | Zanjan | b1 | V24 |             |
| dG8  | <i>Vitis vinifera</i> | Sefide<br>Bidane<br>keshmeshi | Zanjan | b1 | V20 |             |
| dG9  | <i>Vitis vinifera</i> | Qermez<br>Bidane<br>Keshmeshi | Zanjan | b1 | V24 |             |
| C4   | <i>Vitis vinifera</i> | Sefide<br>Bidane<br>keshmeshi | Zanjan | b1 | V1  | Cluster III |
| C6   | <i>Vitis vinifera</i> | Qermez<br>Bidane<br>Keshmeshi | Zanjan | b1 | V3  | Cluster IV  |
| dG10 | <i>Vitis vinifera</i> | Qermez<br>Bidane<br>Keshmeshi | Zanjan | b1 | V24 |             |
| dG11 | <i>Vitis vinifera</i> | Sefide<br>Bidane<br>keshmeshi | Zanjan | b1 | V24 |             |
| dG12 | <i>Vitis vinifera</i> | Qermez<br>Bidane<br>Keshmeshi | Zanjan | b1 | V20 | Cluster III |
| DG19 | <i>Vitis vinifera</i> | Qermez<br>Bidane<br>Keshmeshi | Qazvin | b1 | V24 |             |

|      |                       |                               |                      |    |     |             |
|------|-----------------------|-------------------------------|----------------------|----|-----|-------------|
| DG20 | <i>Vitis vinifera</i> | Qermez<br>Bidane<br>Keshmeshi | Qazvin               | b1 | V24 |             |
| DG21 | <i>Vitis vinifera</i> | Qermez<br>Bidane<br>Keshmeshi | Qazvin               | b1 | V24 |             |
| DG22 | <i>Vitis vinifera</i> | Qermez<br>Bidane<br>Keshmeshi | Qazvin               | b1 | V24 |             |
| DG23 | <i>Vitis vinifera</i> | Qermez<br>Bidane<br>Keshmeshi | Qazvin               | b6 | V24 | Cluster III |
| DW1  | <i>C. arvensis</i>    |                               | Zanjan               | b1 | V24 |             |
| DW3  | <i>C. arvensis</i>    |                               | Zanjan               | b1 | V1  | Cluster III |
| DW5  | <i>C. arvensis</i>    |                               | Zanjan               | b1 | V3  | Cluster IV  |
| DW7  | <i>C. arvensis</i>    |                               | Qazvin               | b1 | V24 |             |
| DW11 | <i>E. bonariensis</i> |                               | Qazvin               | b1 | V3  |             |
| DW12 | <i>E. bonariensis</i> |                               | Qazvin               | b1 | V1  | Cluster IV  |
| AW2  | <i>C. arvensis</i>    |                               | Azarbaijan<br>Gharbi | b1 | V1  |             |
| LW19 | <i>C. arvensis</i>    |                               | Lorestan             | b1 | V15 |             |
| CoK1 | <i>C. arvensis</i>    |                               | Khorasan<br>Razavi   | b1 | V15 |             |
